# Supplementary material for: Cell-free and cytokine-free self-assembling peptide hydrogel-polycaprolactone composite scaffolds for segmental bone defects
Source: Royal Society of Chemistry journal article supplement (doi:10.1039/d2bm01609e), 2022-12-05
Supplement: d2bm01609e1.pdf [file d2bm01609e1.pdf]

## Electronic supplementary information (ESI)

### Cell-free and cytokine-free self-assembling peptide hydrogel-polycaprolactone composite scaffolds for segmental bone defects

Tong Wu<sup>a,‡</sup>, Yilun Wu<sup>a,‡</sup>, Zhicheng Cao<sup>b</sup>, Lulu Zhao<sup>c</sup>, Jiayi Lv<sup>a</sup>, Jiayi Li<sup>b</sup>, Yue Xu<sup>c</sup>, Po Zhang<sup>b</sup>, Xu Liu<sup>a</sup>, Yuzhi Sun<sup>b</sup>,  
Min Cheng<sup>a</sup>, Kexin Tang<sup>c</sup>, Xiao Jiang<sup>b</sup>, Chen Ling<sup>b</sup>, Qingqiang Yao<sup>b\*</sup>, Yishen Zhu<sup>a\*</sup>

\*Corresponding authors

a. College of Biotechnology and Pharmaceutical Engineering, Nanjing Tech University, 211816, Nanjing, China

b. Department of Orthopaedic Surgery, Institute of Digital Medicine, Nanjing First Hospital, Nanjing Medical University, 210006, Nanjing, China

c. College of Pharmaceutical Sciences, Nanjing Tech University, 211816, Nanjing, China

E-mail: zhuyish@njtech.edu.cn

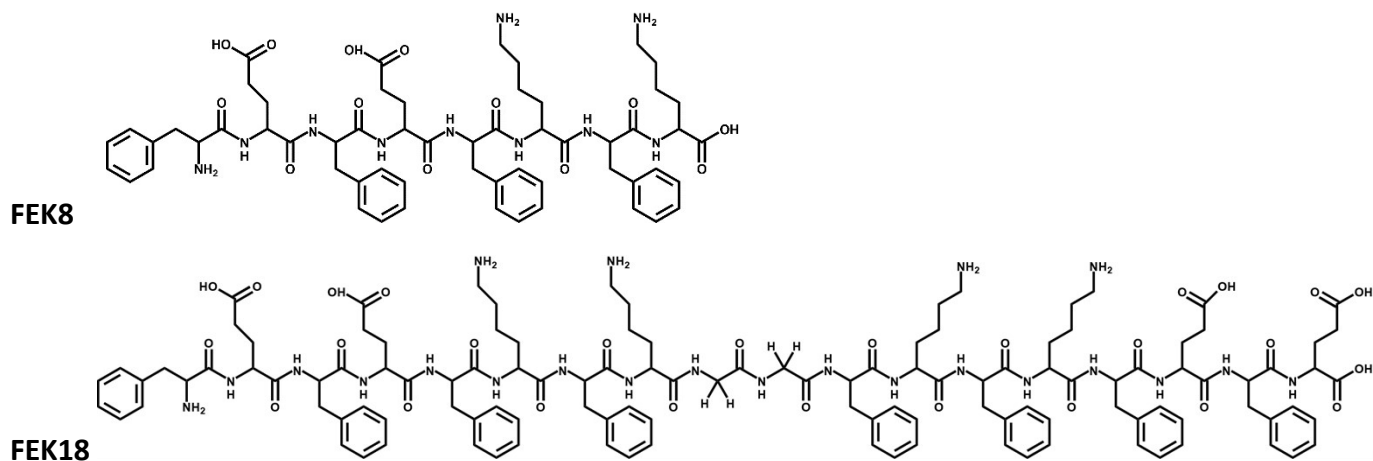

**Figure S1.** The chemical structures of FEK8 and FEK18.

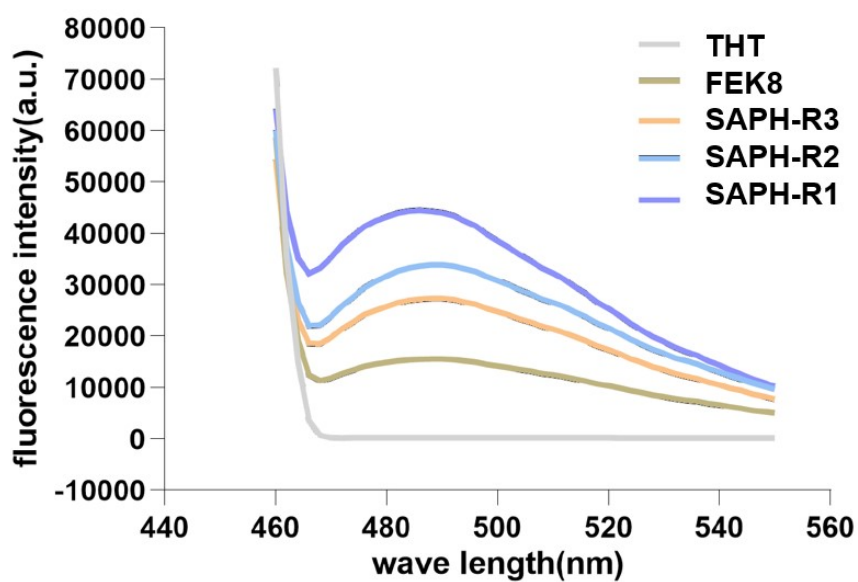

**Figure S2.** The UV-vis absorbance of ThT-treated SAPHs.

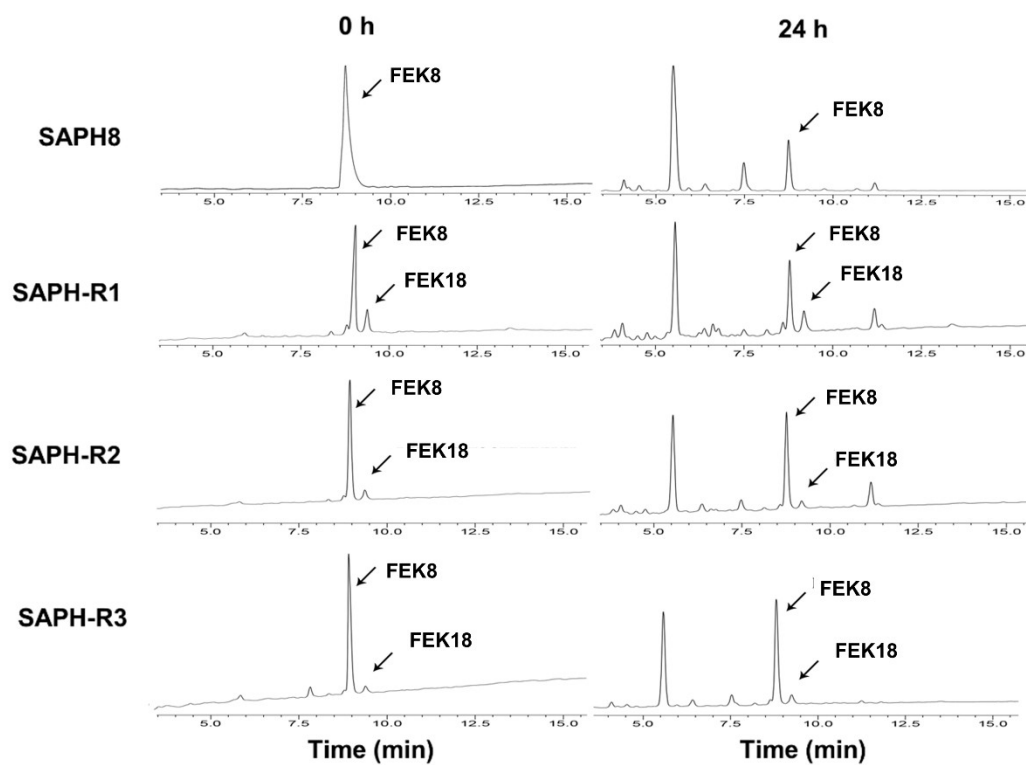

**Figure S3.** The HPLC retention peaks of SAPH treated with proteinase K for 0 h and 24 h. The SAPH8 peak areas were integrated to calculate the degradation rate.

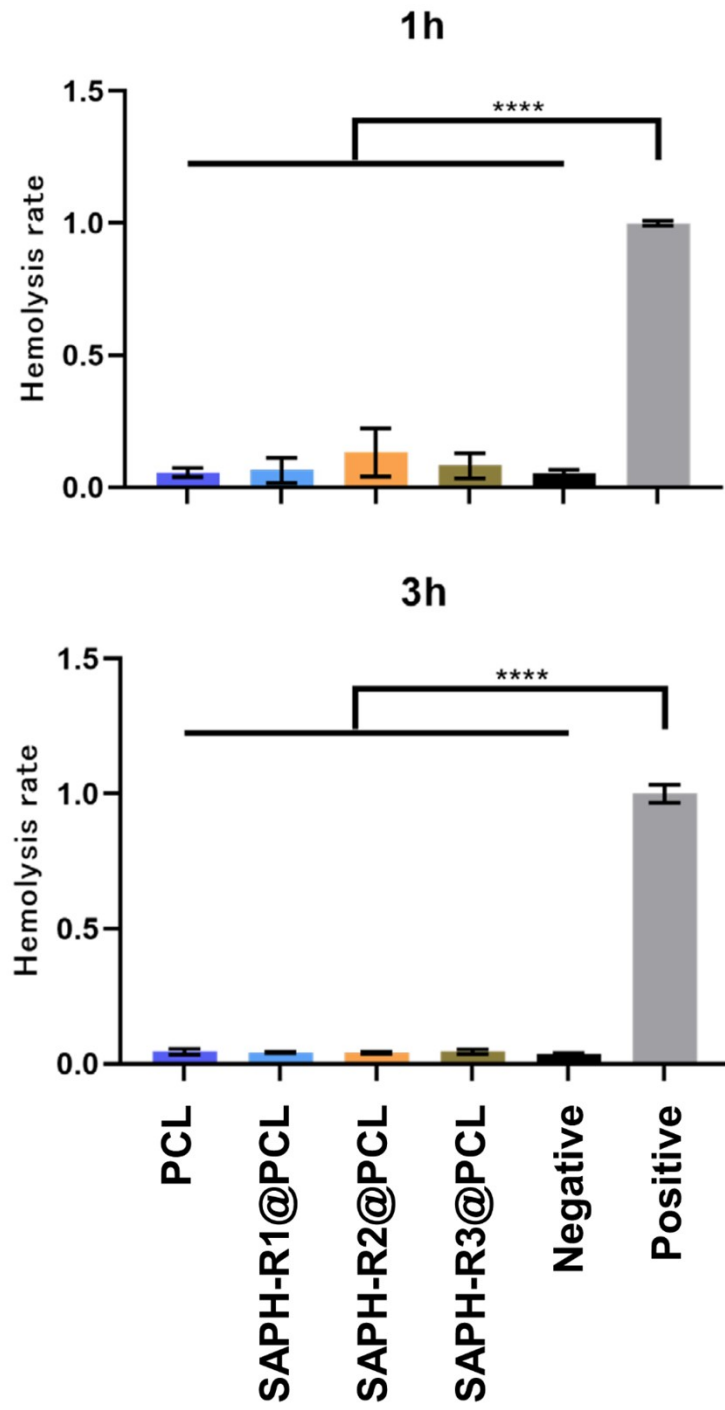

**Figure S4.** Haemolysis after incubating with PCL or SAPH-PCL composite scaffolds for 1h and 3 h (n =3). \*\*\*\*  $p < 0.0001$ .

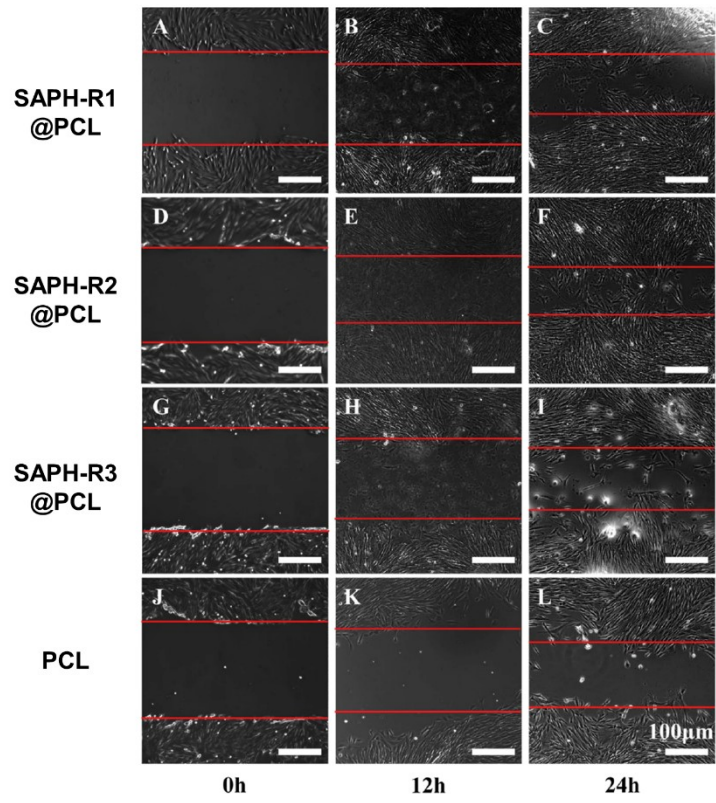

**Figure S5.** The microscopy images of BMSC migration in the scratch stimulation.

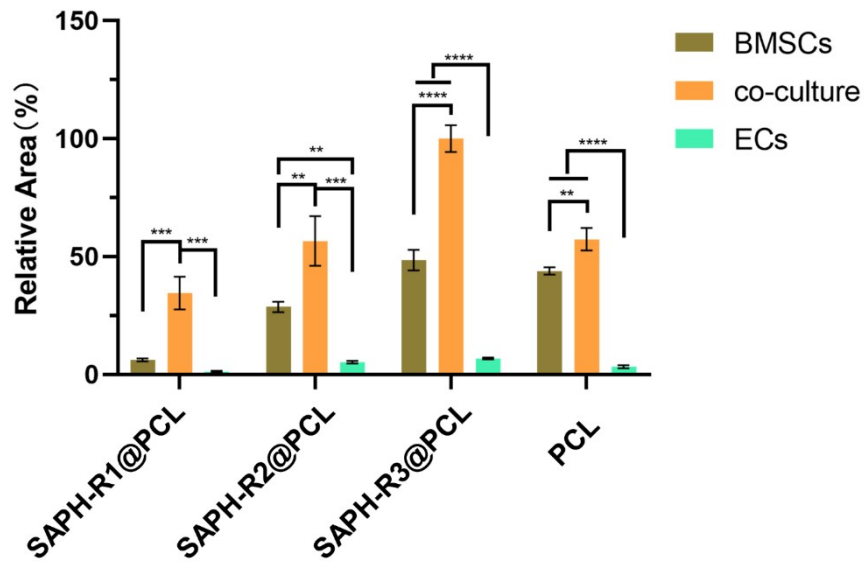

**Figure S6.** Statistical analysis of the alizarin red positive area in Figure 2E.

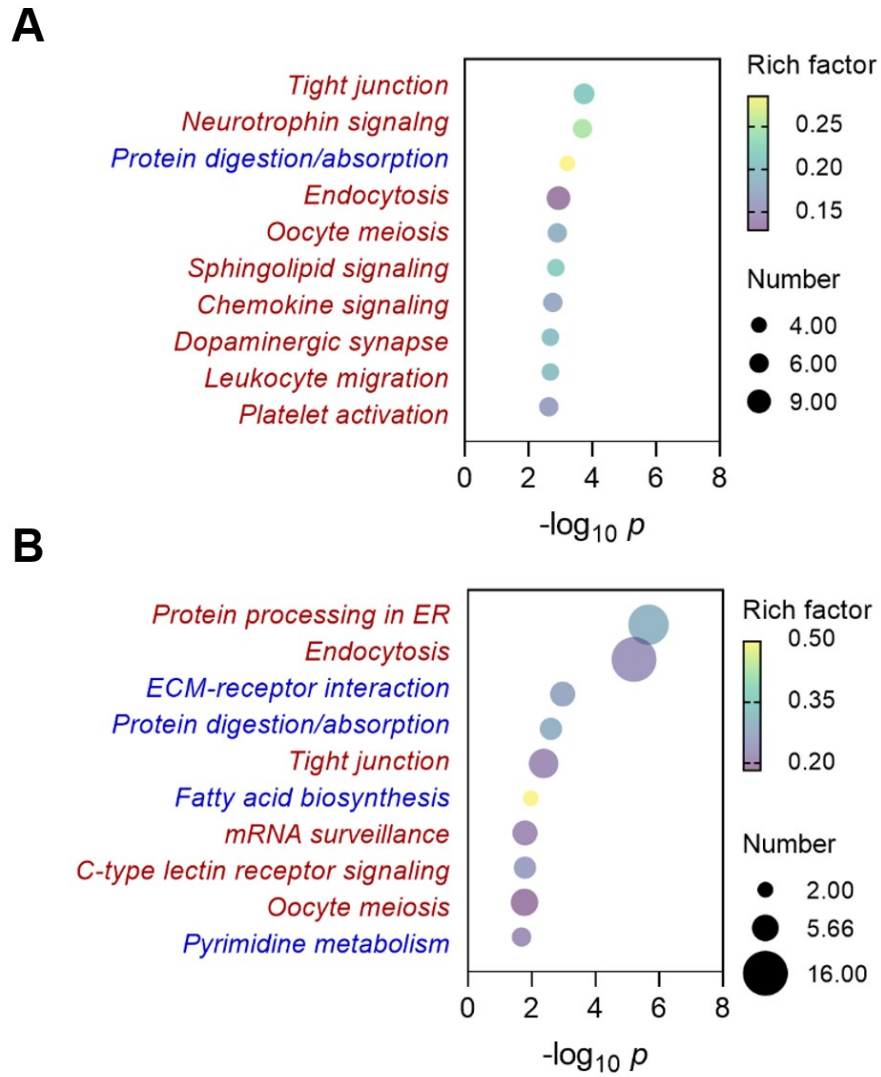

**Figure S7.** The top 10 KEGG pathways of the most significant expression differentiation between enrichment (A) PCL-4m vs CTR-4m and (B) SAPH-R3@PCL-4m vs CTR-4m. The differentiation was calculated using Fisher's exact test to determine the  $p$  value. Up and down regulation were shown as red and blue, respectively.

**Table S1.** The expression of differential proteins/differential in Wnt pathway.

| KEGG Name                            | Accession      | CTR-4m      | PCL-4m      | SAPH-R3@<br>PCL-4m | CTR-6m      | PCL-6m      | SAPH-R3@<br>PCL-6m |
|--------------------------------------|----------------|-------------|-------------|--------------------|-------------|-------------|--------------------|
| <b><i>Protein</i></b>                |                |             |             |                    |             |             |                    |
| CaMKII                               | O77708         | 0.720±0.016 | 0.809±0.229 | 1.164±0.289        | 0.869±0.094 | 1.084±0.060 | 0.974±0.038        |
| CaN                                  | A0A5F9CZB0     | 0.754±0.028 | 0.860±0.097 | 1.155±0.136        | 0.930±0.022 | 0.999±0.021 | 1.001±0.034        |
| CK2                                  | G1SN56         | 0.825±0.021 | 1.075±0.045 | 0.937±0.054        | 0.969±0.126 | 0.979±0.024 | 1.006±0.016        |
| CK2                                  | A0A5F9D4P0     | 0.606±0.025 | 1.003±0.093 | 1.023±0.153        | 1.066±0.063 | 1.030±0.061 | 0.962±0.048        |
| CK2                                  | P67873         | 0.773±0.029 | 1.109±0.403 | 1.096±0.022        | 0.857±0.065 | 0.800±0.049 | 1.005±0.132        |
| Duplin                               | G1TK69         | 1.817±0.078 | 0.538±0.080 | 0.629±0.364        | 0.948±0.180 | 0.707±0.017 | 0.717±0.239        |
| PEDF                                 | G1SCK5         | 2.119±0.360 | 0.652±0.159 | 1.148±0.352        | 0.779±0.222 | 1.067±0.112 | 1.080±0.282        |
| Rac                                  | G1TAX7         | 0.632±0.038 | 1.038±0.128 | 0.850±0.110        | 1.112±0.289 | 0.883±0.113 | 0.941±0.081        |
| RhoA                                 | G1T567         | 0.611±0.065 | 1.122±0.093 | 0.997±0.062        | 0.951±0.077 | 0.953±0.013 | 1.031±0.110        |
| Skp1                                 | G1TTU6         | 0.600±0.142 | 1.044±0.099 | 1.033±0.067        | 0.914±0.153 | 0.915±0.108 | 1.168±0.300        |
| TBL1                                 | G1TCY8         | 1.362±0.111 | 0.972±0.081 | 0.893±0.047        | 1.020±0.026 | 0.913±0.030 | 0.971±0.055        |
| <b><i>Phosphorylated protein</i></b> |                |             |             |                    |             |             |                    |
| pCaMKII                              | O77708         | 0.148±0.005 | 0.400±0.208 | 0.763±0.441        | 0.613±0.197 | 0.857±0.069 | 0.649±0.095        |
| pGSK-3β                              | A0A5F9DUX8     | 0.105±0.008 | 0.582±0.267 | 0.793±0.355        | 0.694±0.175 | 0.925±0.099 | 1.061±0.342        |
| pPKA                                 | Q95J97         | 0.380±0.041 | 0.675±0.235 | 0.805±0.187        | 0.852±0.048 | 1.013±0.067 | 0.963±0.025        |
| (p) β-catenin                        | Catenin beta 1 | 0.280±0.003 | 0.648±0.334 | 0.702±0.124        | 0.766±0.186 | 0.955±0.146 | 0.821±0.047        |



**Table S2.** The expression of differential proteins/differential in TGFβ pathway.

| KEGG Name      | Accession  | CTR-4m      | PCL-4m      | SAPH-R3@<br>PCL-4m | CTR-6m      | PCL-6m      | SAPH-R3@<br>PCL-6m |
|----------------|------------|-------------|-------------|--------------------|-------------|-------------|--------------------|
| <i>Protein</i> |            |             |             |                    |             |             |                    |
| FBN1           | G1SKM2     | 3.598±0.217 | 1.201±0.625 | 0.679±0.071        | 0.832±0.080 | 0.742±0.143 | 0.660±0.081        |
| LTBP1          | A0A5F9DQH9 | 1.688±0.009 | 0.933±0.168 | 1.068±0.128        | 0.904±0.104 | 0.856±0.052 | 0.856±0.071        |
| PP2A           | P67777     | 0.562±0.001 | 1.193±0.078 | 1.009±0.103        | 0.848±0.109 | 0.975±0.005 | 1.043±0.073        |
| PP2A           | A0A5F9DM35 | 0.747±0.073 | 1.067±0.122 | 0.987±0.031        | 1.018±0.063 | 1.006±0.070 | 0.922±0.043        |
| RhoA           | G1T567     | 0.611±0.065 | 1.122±0.093 | 0.997±0.062        | 0.951±0.077 | 0.953±0.013 | 1.031±0.110        |
| Skp1           | G1TTU6     | 0.600±0.142 | 1.044±0.099 | 1.033±0.067        | 0.914±0.153 | 0.915±0.108 | 1.168±0.300        |
| TGFβ           | A0A5F9CDR7 | 2.147±0.169 | 1.054±0.133 | 1.379±0.107        | 1.027±0.070 | 1.650±0.096 | 1.536±0.101        |

**Table S3.** The expression of differential proteins/differential in NF- $\kappa$ B pathway.

| KEGG Name                     | Accession  | CTR-4m      | PCL-4m      | SAPH-R3@<br>PCL-4m | CTR-6m      | PCL-6m      | SAPH-R3@<br>PCL-6m |
|-------------------------------|------------|-------------|-------------|--------------------|-------------|-------------|--------------------|
| <i>Protein</i>                |            |             |             |                    |             |             |                    |
| BCL-10                        | G1TB43     | 0.794±0.013 | 0.924±0.145 | 0.959±0.003        | 0.995±0.184 | 0.960±0.050 | 0.946±0.050        |
| BCR                           | P01879     | 1.910±0.283 | 1.449±0.428 | 0.802±0.082        | 0.812±0.069 | 1.002±0.074 | 0.740±0.062        |
| BCR                           | G1TIU0     | 1.520±0.096 | 1.378±0.336 | 0.825±0.243        | 0.895±0.286 | 0.813±0.067 | 0.951±0.168        |
| BTK                           | G1SZN9     | 1.406±0.001 | 0.940±0.055 | 0.841±0.100        | 0.955±0.037 | 0.898±0.107 | 0.878±0.125        |
| CD14                          | G1SLB5     | 0.826±0.019 | 1.006±0.140 | 1.204±0.255        | 0.894±0.058 | 1.086±0.088 | 0.970±0.093        |
| CK2                           | G1SN56     | 0.825±0.021 | 1.075±0.045 | 0.937±0.054        | 0.969±0.126 | 0.979±0.024 | 1.006±0.016        |
| CK2                           | A0A5F9D4P0 | 0.606±0.025 | 1.003±0.093 | 1.023±0.153        | 1.066±0.063 | 1.030±0.061 | 0.962±0.048        |
| CK2                           | P67873     | 0.773±0.029 | 1.109±0.403 | 1.096±0.022        | 0.857±0.065 | 0.800±0.049 | 1.005±0.132        |
| CYLD                          | G1T481     | 1.016±0.001 | 1.356±0.067 | 1.339±0.190        | 1.571±0.251 | 1.487±0.005 | 1.219±0.082        |
| ELKS                          | A0A5F9CI98 | 0.749±0.110 | 0.968±0.085 | 1.011±0.117        | 0.992±0.048 | 1.004±0.022 | 1.068±0.027        |
| Lyn                           | A0A5F9CT28 | 0.820±0.005 | 1.047±0.035 | 0.879±0.026        | 1.076±0.173 | 0.931±0.077 | 0.890±0.033        |
| VACAM1                        | A0A5F9DFM7 | 1.119±0.022 | 1.069±0.060 | 0.813±0.068        | 1.171±0.095 | 0.992±0.083 | 0.779±0.207        |
| <i>Phosphorylated protein</i> |            |             |             |                    |             |             |                    |
| pBCL-10                       | G1TB43     | 0.104±0.018 | 0.416±0.200 | 0.757±0.211        | 0.799±0.256 | 0.795±0.042 | 0.844±0.240        |
| pPARP1                        | G1TEI0     | 0.141±0.050 | 0.694±0.120 | 0.568±0.073        | 1.023±0.024 | 0.727±0.117 | 0.581±0.006        |

**Table S4.** The expression of differential proteins/differential in HIF-1 $\alpha$  pathway.

| KEGG Name                     | Accession  | CTR-4m      | PCL-4m      | SAPH-R3@<br>PCL-4m | CTR-6m      | PCL-6m      | SAPH-R3@<br>PCL-6m |
|-------------------------------|------------|-------------|-------------|--------------------|-------------|-------------|--------------------|
| <b>Protein</b>                |            |             |             |                    |             |             |                    |
| 4EBP1                         | G1TEF8     | 1.432±0.011 | 0.909±0.207 | 0.937±0.089        | 0.825±0.070 | 1.006±0.220 | 1.082±0.173        |
| CamK                          | O77708     | 0.720±0.016 | 0.809±0.229 | 1.164±0.289        | 0.869±0.094 | 1.084±0.060 | 0.974±0.038        |
| eIF4E                         | A0A5F9DDW9 | 0.781±0.010 | 1.111±0.079 | 0.973±0.041        | 0.952±0.047 | 0.922±0.031 | 0.962±0.095        |
| ENO1                          | A0A5F9D287 | 0.563±0.034 | 1.039±0.059 | 1.088±0.168        | 0.883±0.166 | 1.077±0.032 | 1.006±0.006        |
| ENO1                          | P25704     | 0.611±0.176 | 0.656±0.178 | 1.076±0.365        | 0.752±0.226 | 1.351±0.090 | 1.035±0.310        |
| HK                            | A0A5F9CVK2 | 1.163±0.089 | 1.047±0.189 | 1.124±0.159        | 0.808±0.076 | 1.117±0.078 | 0.913±0.063        |
| HK                            | G1SR18     | 0.817±0.065 | 1.044±0.069 | 1.081±0.037        | 0.941±0.012 | 0.946±0.025 | 1.011±0.062        |
| HMOX1                         | A0A5F9DD47 | 0.724±0.048 | 0.970±0.071 | 1.098±0.059        | 0.937±0.053 | 1.045±0.090 | 1.114±0.040        |
| LDHA                          | A0A5F9DPL1 | 0.607±0.002 | 0.959±0.007 | 0.950±0.176        | 1.026±0.167 | 1.06±0.0890 | 0.944±0.025        |
| LDHA                          | G1TAJ3     | 0.551±0.065 | 0.762±0.143 | 1.066±0.207        | 0.778±0.156 | 1.268±0.055 | 1.054±0.179        |
| PDK1                          | A0A5F9DMI0 | 1.111±0.041 | 1.003±0.032 | 0.882±0.050        | 1.101±0.167 | 0.927±0.136 | 0.903±0.216        |
| PFKL                          | A0A5F9DGX0 | 0.821±0.110 | 0.606±0.121 | 0.984±0.367        | 0.785±0.255 | 1.222±0.051 | 1.084±0.225        |
| PI3K                          | G1TVC1     | 1.573±0.273 | 1.003±0.089 | 0.902±0.030        | 1.076±0.050 | 0.899±0.099 | 0.884±0.182        |
| rpS6                          | A0A5K1UJS7 | 0.736±0.041 | 1.007±0.256 | 0.981±0.039        | 0.947±0.116 | 0.931±0.072 | 1.081±0.039        |
| TFRC                          | G1TCW1     | 0.810±0.032 | 1.033±0.392 | 0.792±0.047        | 1.040±0.133 | 0.927±0.097 | 1.041±0.023        |
| TIMP1                         | A0A5F9CLN4 | 2.501±0.031 | 1.135±0.225 | 1.547±0.303        | 1.197±0.111 | 1.217±0.035 | 1.177±0.119        |
| <b>Phosphorylated protein</b> |            |             |             |                    |             |             |                    |
| pALDOA                        | G1T652     | 0.264±0.137 | 0.586±0.092 | 0.691±0.063        | 0.930±0.057 | 0.945±0.048 | 1.028±0.238        |
| pALDOA                        | P00883     | 0.079±0.029 | 0.288±0.062 | 0.596±0.225        | 0.328±0.116 | 0.725±0.113 | 0.727±0.311        |
| pALDOA                        | P00883     | 0.117±0.078 | 0.308±0.107 | 0.723±0.249        | 0.432±0.161 | 1.004±0.108 | 0.636±0.196        |
| pALDOA                        | P00883     | 0.117±0.079 | 0.328±0.104 | 0.737±0.251        | 0.438±0.173 | 1.034±0.047 | 0.683±0.192        |
| pALDOA                        | P00883     | 0.125±0.074 | 0.337±0.099 | 0.722±0.247        | 0.421±0.157 | 1.033±0.049 | 0.659±0.183        |
| pALDOA                        | P00883     | 0.151±0.027 | 0.383±0.120 | 0.685±0.165        | 0.456±0.197 | 0.775±0.091 | 0.738±0.213        |
| pALDOA                        | P00883     | 0.152±0.014 | 0.500±0.218 | 0.774±0.124        | 0.605±0.112 | 0.879±0.104 | 0.768±0.304        |
| pALDOA                        | P00883     | 0.152±0.113 | 0.331±0.117 | 0.678±0.205        | 0.433±0.194 | 1.073±0.075 | 0.672±0.206        |
| pALDOA                        | P00883     | 0.211±0.111 | 0.538±0.184 | 0.822±0.143        | 0.715±0.031 | 0.949±0.094 | 0.756±0.144        |
| pALDOA                        | P00883     | 0.284±0.144 | 0.501±0.121 | 0.793±0.188        | 0.737±0.105 | 0.929±0.060 | 0.806±0.174        |
| pCamK                         | O77708     | 0.148±0.005 | 0.400±0.208 | 0.763±0.441        | 0.613±0.197 | 0.857±0.069 | 0.649±0.095        |
| pHMOX1                        | G1SZP6     | 0.204±0.074 | 0.530±0.022 | 0.438±0.168        | 0.872±0.049 | 0.673±0.232 | 0.828±0.155        |
| pHMOX1                        | G1SZP6     | 0.238±0.031 | 0.414±0.168 | 0.480±0.019        | 0.843±0.207 | 0.695±0.156 | 0.897±0.335        |
| pPHD                          | U3KPI6     | 0.222±0.051 | 0.442±0.183 | 0.936±0.381        | 0.767±0.136 | 0.901±0.055 | 0.947±0.400        |

**Table S5.** The expression of differential proteins in chemokine signalling, leukocyte migration, or platelet activation

| KEGG Name                              | Accession  | CTR-4m      | PCL-4m      | SAPH-R3@<br>PCL-4m | CTR-6m      | PCL-6m      | SAPH-R3@<br>PCL-6m |
|----------------------------------------|------------|-------------|-------------|--------------------|-------------|-------------|--------------------|
| <b>Protein</b>                         |            |             |             |                    |             |             |                    |
| ACTN1                                  | A0A5F9CV24 | 0.516±0.114 | 1.224±0.078 | 1.170±0.462        | 0.795±0.141 | 1.003±0.174 | 0.976±0.157        |
| ACTN2                                  | G1TEM1     | 0.719±0.024 | 0.765±0.351 | 1.058±0.369        | 0.813±0.275 | 1.193±0.060 | 1.137±0.529        |
| ACTN3                                  | G1U4H8     | 0.554±0.018 | 0.619±0.232 | 0.942±0.235        | 0.742±0.213 | 1.275±0.150 | 1.350±0.482        |
| ACTN4                                  | A0A5F9D4S1 | 0.674±0.062 | 0.888±0.143 | 1.050±0.075        | 0.960±0.034 | 0.995±0.047 | 1.093±0.253        |
| ARRB1                                  | A0A5F9CCH4 | 0.788±0.128 | 0.996±0.114 | 0.759±0.107        | 1.115±0.241 | 0.957±0.057 | 1.109±0.035        |
| BTK                                    | G1SZN9     | 1.406±0.001 | 0.940±0.055 | 0.841±0.100        | 0.955±0.037 | 0.898±0.107 | 0.878±0.125        |
| CDC42                                  | G1U978     | 0.738±0.068 | 1.143±0.216 | 0.898±0.191        | 0.906±0.186 | 1.005±0.047 | 1.089±0.173        |
| COL1A1                                 | A0A5F9CXS8 | 6.445±0.815 | 0.489±0.264 | 0.518±0.127        | 0.897±0.64  | 1.029±0.397 | 0.449±0.019        |
| COL1A1                                 | G1T4A5     | 5.928±1.316 | 0.536±0.255 | 0.545±0.085        | 0.964±0.691 | 1.001±0.105 | 0.433±0.100        |
| COL1A2                                 | G1T2Z5     | 5.324±1.185 | 0.610±0.261 | 0.620±0.078        | 1.044±0.776 | 0.956±0.105 | 0.487±0.081        |
| COL3A1                                 | A0A5F9C9Q2 | 6.050±1.541 | 0.519±0.254 | 0.551±0.117        | 1.045±0.828 | 0.943±0.107 | 0.414±0.094        |
| (C-X-C motif<br>chemokines)            | Q5VI85     | 0.857±0.092 | 1.133±0.26  | 0.790±0.261        | 1.086±0.062 | 0.866±0.014 | 1.187±0.038        |
| FCER1G                                 | A0A5F9CIF9 | 1.181±0.001 | 1.155±0.253 | 0.781±0.057        | 1.004±0.055 | 0.991±0.020 | 0.995±0.063        |
| FERM                                   | G1SCP8     | 0.580±0.050 | 0.908±0.032 | 1.122±0.172        | 0.926±0.124 | 1.048±0.043 | 1.072±0.153        |
| FOXO3                                  | G1SZC6     | 5.139±0.087 | 1.130±0.581 | 1.174±0.202        | 0.703±0.313 | 1.178±0.162 | 0.927±0.026        |
| GNAI2                                  | G1TRG8     | 0.713±0.040 | 1.02±0.029  | 0.975±0.128        | 0.997±0.110 | 1.001±0.04  | 1.044±0.098        |
| GNAI3                                  | G1SP68     | 0.806±0.017 | 1.068±0.093 | 1.100±0.249        | 0.973±0.025 | 0.976±0.086 | 0.949±0.111        |
| GNAQ                                   | G1TBW7     | 0.761±0.096 | 0.878±0.181 | 1.014±0.057        | 0.983±0.068 | 1.108±0.071 | 1.100±0.072        |
| GNG5                                   | A0A5F9CPL9 | 1.248±0.045 | 0.927±0.168 | 0.881±0.096        | 1.022±0.255 | 1.025±0.08  | 1.107±0.19         |
| GPIIb                                  | Q9TUN4     | 1.341±0.091 | 1.059±0.151 | 0.852±0.08         | 1.071±0.109 | 0.896±0.06  | 0.999±0.093        |
| GRB2                                   | G1SR27     | 0.735±0.100 | 1.046±0.033 | 1.002±0.092        | 0.926±0.076 | 0.978±0.018 | 0.972±0.023        |
| ITGAL                                  | A0A5F9C4C9 | 0.848±0.025 | 1.024±0.089 | 1.053±0.161        | 0.86±0.041  | 1.156±0.045 | 1.184±0.098        |
| ITGAM                                  | A0A5F9C476 | 1.099±0.066 | 0.891±0.241 | 0.792±0.086        | 1.225±0.183 | 0.929±0.075 | 0.969±0.011        |
| ITGB                                   | A0A5F9CHW0 | 1.471±0.043 | 0.992±0.023 | 0.905±0.050        | 1.023±0.059 | 0.955±0.052 | 0.945±0.083        |
| LYN                                    | A0A5F9CT28 | 0.820±0.005 | 1.047±0.035 | 0.879±0.026        | 1.076±0.173 | 0.931±0.077 | 0.890±0.033        |
| MYL12B                                 | G1T7S0     | 0.402±0.001 | 0.851±0.286 | 1.078±0.113        | 0.841±0.278 | 0.765±0.058 | 1.213±0.412        |
| MYLPP                                  | P02608     | 0.679±0.085 | 0.543±0.292 | 1.003±0.390        | 0.655±0.335 | 1.306±0.188 | 1.489±0.638        |
| PECAM1                                 | A0A5F9DIF8 | 1.367±0.146 | 1.065±0.163 | 1.022±0.197        | 0.859±0.083 | 0.981±0.117 | 0.928±0.069        |
| PIK3CD                                 | G1TVC1     | 1.573±0.273 | 1.003±0.089 | 0.902±0.03         | 1.076±0.050 | 0.899±0.099 | 0.884±0.182        |
| PPP1CC                                 | G1SWW8     | 0.754±0.019 | 1.203±0.019 | 0.920±0.151        | 1.082±0.081 | 0.891±0.090 | 0.955±0.070        |
| PPP1R12A                               | G1TC70     | 0.800±0.034 | 0.952±0.091 | 1.014±0.009        | 0.938±0.083 | 0.918±0.041 | 1.038±0.110        |
| Rac2                                   | G1TAX7     | 0.632±0.038 | 1.038±0.128 | 0.850±0.110        | 1.112±0.289 | 0.883±0.113 | 0.941±0.081        |
| RAP1A                                  | A0A5F9D613 | 0.726±0.038 | 1.079±0.049 | 0.960±0.134        | 0.95±0.092  | 0.913±0.029 | 1.066±0.104        |
| RAP1B                                  | A0A5F9D525 | 0.680±0.065 | 1.042±0.046 | 0.986±0.011        | 0.902±0.098 | 0.955±0.138 | 1.216±0.137        |
| (RGS domain-<br>containing<br>protein) | A0A5F9D1C3 | 0.746±0.057 | 1.016±0.131 | 0.898±0.014        | 1.089±0.125 | 0.896±0.069 | 0.968±0.116        |
| RhoA                                   | G1T567     | 0.611±0.065 | 1.122±0.093 | 0.997±0.062        | 0.951±0.077 | 0.953±0.013 | 1.031±0.110        |

|                 |            |             |             |             |             |             |             |
|-----------------|------------|-------------|-------------|-------------|-------------|-------------|-------------|
| STAT1           | AOA5F9D806 | 0.731±0.092 | 1.167±0.210 | 0.953±0.175 | 0.976±0.176 | 1.103±0.061 | 0.950±0.074 |
| (Tau kinase)    | G1U0J7     | 0.851±0.019 | 1.128±0.022 | 1.044±0.165 | 0.858±0.008 | 0.935±0.101 | 1.054±0.164 |
| Uncharacterized | G1SHY0     | 1.184±0.048 | 0.841±0.054 | 0.939±0.041 | 1.070±0.059 | 0.964±0.007 | 1.036±0.120 |
| Uncharacterized | AOA5F9DKI8 | 0.807±0.077 | 0.996±0.073 | 0.943±0.082 | 1.047±0.041 | 0.989±0.011 | 0.957±0.050 |
| VAMP8           | G1SHE6     | 1.239±0.051 | 1.031±0.214 | 0.873±0.057 | 1.110±0.042 | 1.030±0.259 | 0.955±0.075 |
| VCAM1           | AOA5F9DFM7 | 1.119±0.022 | 1.069±0.060 | 0.813±0.068 | 1.171±0.095 | 0.992±0.083 | 0.779±0.207 |

---

**Table S6.** The expression of differential proteins involved in other pathways.

| KEGG Name                     | Accession  | CTR-4m      | PCL-4m      | SAPH-R3@<br>PCL-4m | CTR-6m      | PCL-6m      | SAPH-R3@<br>PCL-6m |
|-------------------------------|------------|-------------|-------------|--------------------|-------------|-------------|--------------------|
| <i>Protein</i>                |            |             |             |                    |             |             |                    |
| 14-3-3                        | AOA5F9DHA9 | 0.574±0.059 | 0.888±0.044 | 1.026±0.055        | 0.965±0.039 | 1.058±0.052 | 1.124±0.122        |
| 14-3-3                        | G1SDY5     | 0.585±0.030 | 0.979±0.082 | 1.033±0.067        | 0.923±0.136 | 1.039±0.057 | 1.118±0.142        |
| 14-3-3                        | G1SIT9     | 0.652±0.090 | 0.895±0.085 | 0.993±0.086        | 1.044±0.136 | 1.047±0.140 | 1.129±0.161        |
| 14-3-3                        | G1SZD6     | 0.788±0.054 | 0.909±0.006 | 0.975±0.051        | 1.022±0.062 | 1.011±0.043 | 1.038±0.117        |
| 14-3-3                        | G1T7R2     | 0.500±0.022 | 0.876±0.009 | 1.024±0.130        | 1.044±0.039 | 1.023±0.054 | 1.046±0.037        |
| 4EBPs                         | G1TEF8     | 1.432±0.011 | 0.909±0.207 | 0.937±0.089        | 0.825±0.070 | 1.006±0.220 | 1.082±0.173        |
| COL1A1                        | AOA5F9CXS8 | 6.445±0.815 | 0.489±0.264 | 0.518±0.127        | 0.897±0.640 | 1.029±0.397 | 0.449±0.019        |
| COL1A1                        | G1T4A5     | 5.928±1.316 | 0.536±0.255 | 0.545±0.085        | 0.964±0.691 | 1.001±0.105 | 0.433±0.100        |
| COL1A2                        | G1T2Z5     | 5.324±1.185 | 0.610±0.261 | 0.620±0.078        | 1.044±0.776 | 0.956±0.105 | 0.487±0.081        |
| COL2A1                        | G1T5V9     | 3.964±1.462 | 0.664±0.189 | 1.442±1.069        | 0.859±0.499 | 0.793±0.152 | 0.419±0.049        |
| eIF4E                         | AOA5F9DDW9 | 0.781±0.010 | 1.111±0.079 | 0.973±0.041        | 0.952±0.047 | 0.922±0.031 | 0.962±0.095        |
| IBSP                          | G1SEM1     | 3.317±0.288 | 0.928±0.354 | 0.756±0.109        | 1.157±0.650 | 0.837±0.073 | 0.637±0.041        |
| ITGA6                         | G1SD83     | 1.160±0.148 | 0.848±0.076 | 0.903±0.082        | 0.996±0.054 | 1.136±0.132 | 1.054±0.076        |
| ITGAL                         | AOA5F9C4C9 | 0.848±0.035 | 1.024±0.109 | 1.053±0.197        | 0.860±0.050 | 1.156±0.055 | 1.184±0.120        |
| ITGAM                         | AOA5F9C476 | 1.098±0.093 | 0.891±0.295 | 0.792±0.106        | 1.225±0.224 | 0.929±0.092 | 0.969±0.014        |
| ITGB3                         | AOA5F9CHW0 | 1.471±0.060 | 0.992±0.028 | 0.905±0.062        | 1.023±0.072 | 0.955±0.064 | 0.945±0.102        |
| ITGB4                         | AOA5F9DC01 | 0.829±0.059 | 0.873±0.200 | 1.065±0.110        | 0.845±0.104 | 1.164±0.158 | 1.157±0.300        |
| LAMA2                         | G1SX80     | 1.589±0.223 | 0.893±0.251 | 0.900±0.134        | 0.917±0.374 | 1.011±0.061 | 1.034±0.194        |
| LAMA3                         | AOA5F9DGZ2 | 1.269±0.103 | 0.844±0.128 | 0.908±0.066        | 1.134±0.145 | 1.142±0.083 | 0.870±0.101        |
| S6                            | AOA5K1UJS7 | 0.736±0.041 | 1.007±0.256 | 0.981±0.039        | 0.947±0.116 | 0.931±0.072 | 1.081±0.039        |
| SPP1                          | P31097     | 3.392±0.584 | 0.986±0.323 | 0.622±0.062        | 1.115±0.605 | 0.813±0.031 | 0.716±0.088        |
| TGFβ                          | AOA5F9CDR7 | 2.147±0.169 | 1.054±0.133 | 1.379±0.107        | 1.027±0.070 | 1.650±0.096 | 1.536±0.101        |
| TIMP1                         | AOA5F9CLN4 | 2.501±0.044 | 1.135±0.318 | 1.547±0.429        | 1.197±0.157 | 1.217±0.050 | 1.177±0.168        |
| PDGFRL                        | G1SNF7     | 1.420±0.226 | 0.627±0.087 | 1.330±0.725        | 0.899±0.142 | 0.930±0.064 | 1.006±0.142        |
| <i>Phosphorylated protein</i> |            |             |             |                    |             |             |                    |
| (p) 14-3-3                    | G1TZP0     | 0.182±0.011 | 0.471±0.112 | 0.573±0.152        | 0.531±0.055 | 1.060±0.169 | 0.885±0.157        |
| pCOL1A2                       | G1T2Z5     | 3.336±0.271 | 0.831±0.151 | 0.647±0.122        | 1.921±1.094 | 1.595±0.287 | 1.002±0.146        |
| pFGF2                         | G1SDD5     | 0.145±0.069 | 0.563±0.103 | 0.773±0.151        | 0.733±0.200 | 0.938±0.237 | 1.171±0.344        |
| pIBSP                         | G1SEM1     | 0.426±0.026 | 0.507±0.135 | 0.756±0.249        | 0.718±0.210 | 0.987±0.082 | 1.011±0.208        |
| pIBSP                         | G1SEM1     | 1.124±0.168 | 0.566±0.129 | 0.653±0.158        | 0.899±0.198 | 0.985±0.090 | 0.840±0.080        |
| pIBSP                         | G1SEM1     | 1.755±0.174 | 0.825±0.265 | 0.557±0.174        | 1.279±0.729 | 1.021±0.176 | 0.805±0.134        |
| pMRC1                         | AOA5F9DHB6 | 0.185±0.035 | 0.724±0.561 | 1.100±0.410        | 0.724±0.287 | 0.724±0.062 | 0.882±0.103        |
| pMSR1                         | AOA5F9C937 | 0.311±0.028 | n.d.        | 0.847±0.306        | 0.765±0.066 | 0.881±0.094 | 0.819±0.160        |
| pSPP1                         | P31097     | 1.191±0.113 | 0.735±0.273 | 0.654±0.199        | 0.725±0.088 | 0.933±0.316 | 0.564±0.195        |
| pSPP1                         | P31097     | 1.290±0.123 | 0.783±0.474 | 0.605±0.142        | 0.702±0.068 | 0.850±0.191 | 0.526±0.083        |
| pSPP1                         | P31097     | 1.529±0.206 | 0.827±0.474 | 0.732±0.183        | 0.647±0.103 | 0.857±0.150 | 0.634±0.216        |
| pSPP1                         | P31097     | 1.704±0.202 | 0.682±0.226 | 0.607±0.158        | 0.923±0.283 | 1.042±0.251 | 0.576±0.184        |
| pSPP1                         | P31097     | 1.844±0.001 | 0.871±0.401 | 0.715±0.211        | 0.747±0.081 | 0.871±0.161 | 0.597±0.211        |
| pYAP/TAZ                      | G1TYX6     | 0.312±0.023 | 0.628±0.037 | 0.919±0.337        | 0.617±0.174 | 0.840±0.048 | 0.790±0.178        |

\* *n.d.*: not detected

## Experimental Section

### 1. Self-assembling peptide hydrogel synthesis

The FEK8 and FEK18 peptides, with structure shown in Fig. S1, were synthesized according to previously reported methods.<sup>1</sup> To prepare peptide solutions, 20.00 mg of FEK8 (18  $\mu$ mol) or 20.86mg FEK18 (equivalent to 18  $\mu$ mol FEK8) powders were dissolved into 1mL of Milli Q water under magnetic stirring, respectively. A series of synthetic peptide hydrogels were prepared based on peptide self-assembly, denoted as SAPH18, SAPH-R1, SAPH-R2, SAPH-R3, and SAPH8 according to their FEK18:FEK8 molar ratios (1:0, 1:2, 1:4, 1:6, and 0:1, respectively). To form the SAPH8 and SAPH18, the FEK8 and FEK18 solutions were heated at 80°C for 3h, followed by cooling down to ambient temperature and adjusting pH to 7.2, respectively. Similarly, the SAPH-R1, SAPH-R2, and SAPH-R3 hydrogels were prepared using this method by adjusting the FEK18/FEK8 solutions to 4.5mM/9mM, 3mM/12mM, and 2.25mM/13.5mM, respectively.

### 2. Preparation of SAPH-PCL composite scaffolds

The PCL scaffold model was designed by Auto CAD (version 2018) and printed by a fused deposition modeling (FDM) 3D printer (Creality CR-2020, Shenzhen, China) using the following parameters: nozzle diameter 0.4 mm, angle 0° and 90°, layer height 0.2 mm, filling rate 55%. To prepare SAPH-PCL composite scaffolds, the PCL scaffold was soaked in corresponding hydrogels for 12h, with occasional vacuum to degas. Accordingly, the SAPHs were infilled into 3D printed PCL scaffolds, denoted as SAPH-R1@PCL, SAPH-R2@PCL, and SAPH-R3@PCL, respectively.

### 3. Circular dichroism

The SAPH8, SAPH18, SAPH-R1, SAPH-R2, and SAPH-R3 samples were diluted at 1:150, then applied to a Chirascan circular dichroism spectrometer (Applied Photophysics, Leatherhead, UK). The spectrum between 185 to 245 nm was recorded, respectively.

### 4. Water contact angle

The water contact angles of the PCL, SAPH-R1@PCL, SAPH-R2@PCL, and SAPH-R3@PCL were detected ( $n=3$ ) by a static water contact angle meter (Maishi DropMeter A100P, Ningbo, China), respectively.

### 5. Scanning electron microscopy observation

The PCL, SAPH-R1@PCL, SAPH-R2@PCL and SAPH-R3@PCL were snap-frozen at -20 °C and freeze-dried, respectively. Each sample was gold-plated using a JFC-1600 photoresister (JEOL Akishima, Japan) and the morphology was observed using an SEM (JSM-6510, JEOL) with an accelerating voltage of 5.0 kV.

PCL scaffold with infill density ranging from 30% to 70% were prepared and their pore sizes in SEM images were quantified by measuring the diameters of randomly picked 10 positions.

## **6. Mechanical characterization**

Oscillating rheology analysis was carried out in SAPH-R1, SAPH-R2, and SAPH-R3 samples at 1% strain. The elastic moduli ( $G'$ ) and viscous moduli ( $G''$ ) were documented, respectively. An electronic universal material testing machine (Z050, Zwick/Roell) was used to test PCL scaffolds with infill density from 30% to 70%, or the SAPH-PCL composite scaffolds with fixed 55% infill density. The measurement was carried out by compression or tension under a speed of 1mm/min.

## **7. Thioflavin T (ThT) fluorescence assay**

ThT solutions were added to the SAPH8, SAPH-R1, SAPH-R2, and SAPH-R3 solutions to make a final ThT concentration of 50  $\mu$ M, respectively. After 5 min incubation, 100  $\mu$ L of supernatant from each sample was transferred to a 96-well plate to record the emission spectrum from 460 to 550 nm under 442 nm excitation wavelength using a fluorescence microplate reader (BioTek Synergy 2, Winooski, VT).

## **8. Proteinase K degradation**

For each sample, 1 mL SAPH was digested using proteinase K (Aladdin, Shanghai, China) at a final concentration of 4 U mL<sup>-1</sup> at 37 °C with 200 rpm shaking. The degradation of SAPHs was analyzed using a high performance liquid chromatography (DIONEX 3000 system, Germany) and quantified by corresponding FEK8 peak area integrated at predetermined time points (0, 2, 4, 8, and 12 h), respectively.

## **9. Hemolytic assay**

Fresh blood was collected from rabbit ears. After adding heparin as an anticoagulant, the red blood cells were collected by centrifugation at 1500 rpm for 15 min, then rinsed by 0.9% NaCl. The 50  $\mu$ L of 5% red blood cell suspension was incubated with the SAPH-R1@PCL, SAPH-R2@PCL, SAPH-R3@PCL and the PCL scaffold (5mm $\times$ 1mm, n=3) in a 96-well plate, respectively. Simultaneously, 50  $\mu$ L of 5% red blood cells incubated with 200  $\mu$ L of distilled water and 0.9% NaCl were used as positive and negative controls. After incubation at 37 °C for 1-5h, the supernatant was collected to measure the absorbance at 576 nm (n=3) using a UV spectrophotometer (Thermo EVOLUTION201, Waltham, MA). The hemolysis rate (%) was calculated by the following equation:



Hemolysis rate (%) = (A sample - A negative control) / (A positive control - A negative control) \* 100%.

## **10. Cell culture**

Rabbit BMSCs were obtained as described in our previous study.<sup>2</sup> In brief, bone marrow from rabbit legs was flushed out using cold PBS and cultured in Dulbecco's modified Eagle medium (DMEM) supplemented with 10% fetal bovine serum (FBS) and 1% penicillin/streptomycin. The medium was replenished every 3 days. After 10 days, the BMSCs were collected by 0.25% trypsin digestion for further works. Endothelial cells (ECs) were purchased from Procell CO., LTD (Wuhan, China) and cultured in an endothelial-specific culture medium (Procell). The BMSC/EC co-culture was achieved by 1:1 mixing of BMSCs and ECs in a mixture of DMEM and the endothelial-specific culture medium (equal volume). All the cells were cultured in a humidified incubator maintained at 37 °C with 5% CO<sub>2</sub>. All experiments were done in triplicate if no specific mention.

## **11. In vitro migration simulation**

BMSCs were seeded in a 6-well plate at a density of 2×10<sup>5</sup> cells/well. When cells reached 90% confluency, 1mm in-width scratches were made using 200 μL pipette tips. After rinse, the PCL, SAPH-R1@PCL, SAPH-R2@PCL and SAPH-R3@PCL were put into the wells for another 24 h incubation in serum free medium, respectively. The migration was determined by measuring the scratch width before and after incubation using a CX23 microscope (Olympus, Japan) The migration distance was measured by Image J (version 1.53) and the migration rate was calculated sequentially.

## **12. Cell proliferation and live/dead staining**

The PCL, SAPH-R1@PCL, SAPH-R2@PCL and SAPH-R3@PCL (Φ5mm×1mm) were soaked into 96-well plates containing 200 μL medium, respectively. To determine the cell proliferation, BMSCs, ECs, and BMSC/EC co-culture were seeded onto the scaffolds in corresponding wells at a density of 5×10<sup>3</sup> cells/well, respectively. After 1, 4, and 7 days of incubation, each sample was incubated with 10 μL of CCK-8 working solution (KeyGEN BioTech, China) for 1 h at 37 °C. Then the supernatant was transferred into a new plate to measure the absorbance at 450 nm using a microplate reader (BioTek Synergy 2).

To determine the live/dead cells, the cells were seeded using the same method as described at a density of 2×10<sup>4</sup> cells/well. After 3 days of incubation, the cells were stained with a Live/Dead staining kit (KeyGEN BioTech, China). The samples were then observed using a fluorescence microscope (XDS30, Shunyu, China) to detect the calcein AM-related live cell signals and PI-related dead cell signals.

## **13. Alkaline phosphatase (ALP) activity detection**

The ALP activities were tested using an ALP activity kit (Beyotime, China). In brief, BMSCs, ECs, and BMSC/EC co-culture cells were seeded in a 96-well plate at  $5 \times 10^3$  cells/well, respectively. After culturing with pre-soaked scaffolds ( $\Phi 5\text{mm} \times 1\text{mm}$ ) for 7 and 14 days, the cells were collected and lysed on ice for 5 min using a lysis buffer. Then 50  $\mu\text{L}$  supernatant from the lysate was mixed with 50  $\mu\text{L}$  of substrate solution and incubated 30 min at 37 °C. A series of p-nitrophenol standards were prepared using the same method. After adding 100  $\mu\text{L}$  of stopping solution, the UV absorbance at 405nm was recorded using a microplate reader (BioTek Synergy 2) to calculate the ALP concentration. Simultaneously, the total protein concentration of each lysate supernatant was quantified using a BCA protein assay kit (Beyotime, China).

#### **14. Alizarin red S staining**

BMSCs, ECs, and BMSC/EC co-culture cells were seeded in 6-well plates at  $2 \times 10^4$ /well and incubated with PCL, SAPH-R1@PCL, SAPH-R2@PCL, or SAPH-R3@PCL scaffold ( $\Phi 33\text{mm} \times 1\text{mm}$ ) for 14 days, respectively. Then the cells and corresponding scaffolds were rinsed with PBS and fixed with 4% paraformaldehyde for 20 min. To determine the calcium mineralization using an alizarin red S staining method, the fixed cells were washed 3 times with PBS, followed by staining with alizarin red S solution (Beyotime, China) for 30 min at room temperature. After staining, the samples were rinsed and pictured under an invert phase contrast microscope.

#### **15. Rabbit handling**

Female New Zealand white rabbits (2.5-3.0 kg, 6 month-old) were purchased from Hengtai Experimental Animal Breeding CO., LTD (Wuxi, China). All animal handling procedures were approved by the ethics committee of Nanjing First Hospital (DWSY-22081207).

To establish a segmental ulna defect model, about 30% in length of the anterior ulna (1.2 cm of 4.0 cm) was removed by surgery under xylazine anaesthetizing. The PCL, SAPH-R1@PCL, SAPH-R2@PCL, and SAPH-R3@PCL scaffolds ( $\Phi 6\text{mm} \times 12\text{mm}$ ) were implanted into the defected bone before incision stapling, respectively. For the CTR, the incision was stapled directly without any implantation to the defected ulna. To prevent infections, 20U of penicillin were injected intramuscularly to each rabbit after stapling and 3 days post surgery. After 4 and 6 months, the rabbits were sacrificed and the anterior legs (including radius and ulna) were peeled out for further experiments.

#### **16. Micro-CT scanning and bone mass analysis**

The defected ulna was cut off and scanned using a SkyScan 1176 Micro-CT machine (Bruker, Germany) at 70KV voltage and 9  $\mu\text{m}$  pixel. The results were reconstructed to obtain the 3 dimensional models of bone.

Based on the 3D reconstruction, bone mass analysis was performed using Bruker's CTan software (Version 1.6.10.1) to determine the bone volume/tissue volume (BV/TV), the trabecular thickness (Tb.Th), and the bone mineralization density (BMD).

### **17. Histological staining**

After Micro-CT scanning, the samples were fixed in 4% paraformaldehyde solution for 24 h, rinsed with running water overnight, and soaked in 10% EDTA to remove the mineralized tissue. Then the treated samples were rinsed and treated with ethanol gradient and xylene, followed by paraffin embedding. After cutting into 5  $\mu\text{m}$ -in-thick sections using a microtome, the specimens were stained according to the standard Masson and H&E staining protocol. The specimens were imaged and assessed by histologists in a label-free manner, then typical images were chosen to present the whole specimen status.

### **18. Protein labeling, enrichment, and LC-MS/MS analysis**

TMT labeled proteomic samples were prepared using filter aided proteome preparation (FASP) method as described previously.<sup>3</sup> In brief, tissue samples after 10% EDTA softening were lysed by SDT buffer (4% SDS, 100 mM Tris-HCl, and 1 mM DTT, pH 7.6), followed by BCA quantification. Then 200  $\mu\text{g}$  proteins from each sample were rinsed with 8 M urea and 150 mM Tris-HCl (pH 8.0), followed by incubating with iodine acetamide for 30 min in dark. Each sample was digested with 4  $\mu\text{g}$  of trypsin in 25 mM  $\text{NH}_4\text{HCO}_3$  buffer at 37 °C overnight. The obtained peptide solutions were desalted using a C18 Cartridge column. For each sample, 100  $\mu\text{g}$  of peptides were labeled with TMT (Thermo Fisher) according to the manufactory's instructions. The TMT-labelled peptides were fractionated using a Pierce high-pH reversed phase peptide fractionation kit (Thermo Fisher), then each flow-through was re-dispersed in 12  $\mu\text{L}$  of 0.1% formic acid for sample injection. For phosphopeptide enrichment, the TMT-labelled samples were enriched using a high-select Fe-NTA phosphopeptides enrichment kit (Thermo Fisher), then redissolved in 20  $\mu\text{L}$  of 0.1% formic acid for analysis.

After TMT labeling and Fe enrichment, the peptide samples/ phosphopeptide samples were separated using an Easy-nLCTM system (Thermo Fisher) equipped with Acclaim PepMap 100 C18 and Easy-column C18-A2 columns. The chromatographically separated samples were analyzed using a Q-Exactive mass LC-MS/MS spectrometer.

### **19. Quantitative proteomics**

Raw data from LC-MS/MS were analyzed using Proteome Discoverer 2.4 database for peptide searching and quantification. Peptide mass tolerance was set as  $\pm 20$  ppm, with 0.1 Da fragment mass tolerance. Carbamidomethylation on cysteine, TMT 6/10/16 on lysine, and TMT 6/10/16 on peptide N-termini were set

as fixed modifications, while oxidation on methionine, phosphorylation on tyrosine/serine/threonine (only for phosphopeptide samples) were set as variable modifications. The detected results were further quantified by peak integration and normalized by the area normalization method.

## **20. Proteomic data analysis**

Differential proteins and differential phosphorylated proteins were sorted from the quantified protein with a threshold as p-value (from t-test) <0.05 and fold change > 1.2 or < 0.8. Principal component analysis (PCA) was performed using all quantified proteins/phosphorylated proteins and heat maps were generated using those statistically demonstrating differentiation. All identified proteins were employed for gene ontology (GO) annotation using Blast2GO software and plotted by R scripts. Subsequently, the annotated proteins were blasted against the online KEGG database to retrieve their KEGG orthology identifications. Afterward, the enrichment analysis was applied based on Fisher's exact test considering the whole quantified proteins as a background dataset. Benjamini-Hochberg correction for multiple testing was further applied to adjust derived p-values. And only functional categories and pathways with p-values < 0.05 were considered as significant.

## **21. Statistical analysis**

Data analysis was performed using GraphPad Prism 8 software. Unpaired two-tailed t-test was used to compare between two groups. One-way ANOVA was used to compare between multiple groups with Turkeys' post-test. Results were presented as Mean  $\pm$  SEM, with statistical significant signs (\*, p<0.05; \*\*, p<0.01; \*\*\*, p<0.001).

## **Reference**

1. A. Mujeeb, A. F. Miller, A. Saiani and J. E. Gough, *Acta Biomaterialia*, 2013, **9**, 4609-4617.
2. B. Wei, C. Z. Jin, Y. Xu, X. T. Du, C. Yan, C. Tang, M. Ansari and L. M. Wang, *Tissue Eng Pt A*, 2014, **20**, 2646-2655.
3. C. Ma, W. Wang, Y. Wang, Y. Sun, L. Kang, Q. Zhang and Y. Jiang, *Journal of Proteomics*, 2020, **213**, 103630.
